# Supplementary material for: A new porous Zr-containing catalyst with a phenate group: an efficient catalyst for the catalytic transfer hydrogenation of ethyl levulinate to γ-valerolactone
Source: Royal Society of Chemistry journal article supplement (doi:10.1039/c4gc02104e), 2014-12-17
Supplement: c4gc02104e1.pdf [file c4gc02104e1.pdf]

## Supplementary Information for

### **New porous Zr-containing catalyst with phenate group: efficient catalyst for catalytic transfer hydrogenation of ethyl levulinate to $\gamma$ -valerolactone**

Jinliang Song\*, Lingqiao Wu, Baowen Zhou, Huacong Zhou, Honglei Fan, Yingying Yang, Qinglei Meng and Buxing Han\*

Beijing National Laboratory for Molecular Sciences, CAS Key Laboratory of Colloid and Interface and Chemical Thermodynamics, Institute of Chemistry, Chinese Academy of Sciences, Beijing 100190, China. Tel/fax: 86-10-62562821. E-mail: songjl@iccas.ac.cn, hanbx@iccas.ac.cn.

## Table of Contents

|                                                                                 |           |
|---------------------------------------------------------------------------------|-----------|
| <b>1. Table S1. Physical properties of Zr-BDC and Zr-HBA.....</b>               | <b>S2</b> |
| <b>2. Fig. S1. N<sub>2</sub> adsorption-desorption isotherm for Zr-BDC.....</b> | <b>S2</b> |
| <b>3. Fig. S2. NH<sub>3</sub>-TPD spectra of Zr-HBA.....</b>                    | <b>S3</b> |
| <b>4. Fig. S3. CO<sub>2</sub>-TPD spectra of Zr-HBA.....</b>                    | <b>S4</b> |
| <b>5. Fig. S4. TEM image of the as-prepared Zr-HBA.....</b>                     | <b>S5</b> |

1. **Table S1.** Physical properties of Zr-BDC and Zr-HBA.

| Sample <sup>a</sup> | BET surface area (m <sup>2</sup> g <sup>-1</sup> ) <sup>b</sup> | Pore volume (cm <sup>3</sup> g <sup>-1</sup> ) <sup>c</sup> | Pore diameter (nm) <sup>d</sup> |
|---------------------|-----------------------------------------------------------------|-------------------------------------------------------------|---------------------------------|
| Zr-BDC              | 257.9                                                           | 0.20                                                        | 4.5                             |
| Zr-HBA              | 87.3                                                            | 0.21                                                        | 8.0                             |

<sup>a</sup>The sample was degassed at 100 °C for 24 h. <sup>b</sup>Surface Area based on multipoint BET method. <sup>c</sup>Pore volume and pore diameter based on BJH method.

2. **Fig. S1**

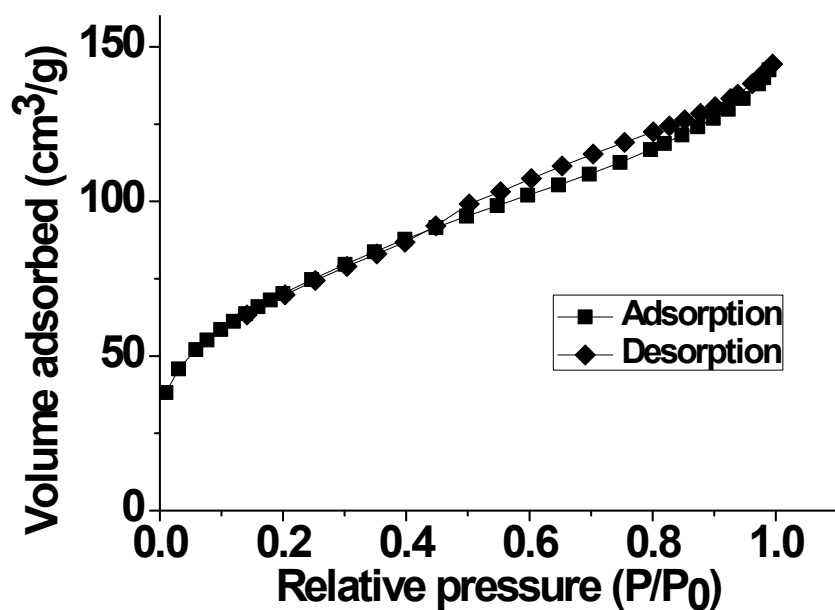

**Fig. S1.** N<sub>2</sub> adsorption-desorption isotherm for Zr-BDC.

### 3. Fig. S2

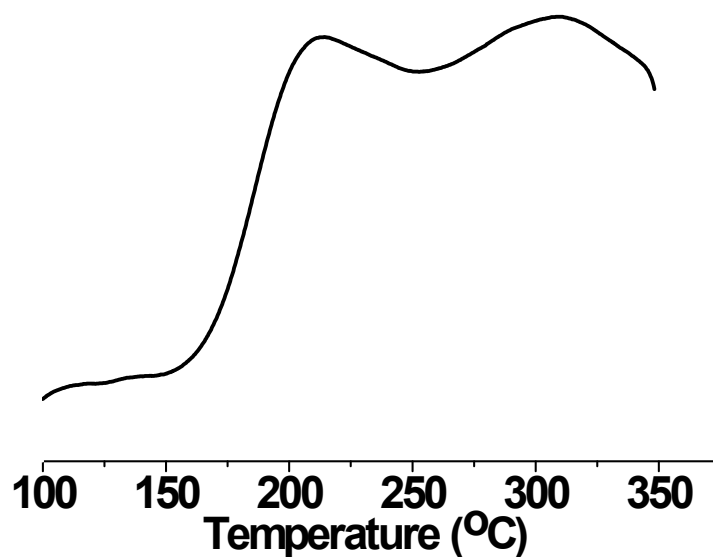

**Fig. S2.** NH<sub>3</sub>-TPD spectra of Zr-HBA. Temperature-programmed desorption of ammonia (NH<sub>3</sub>-TPD) was performed on Micromeritics' AutoChem 2950 HP Chemisorption Analyzer. The catalysts were charged into the quartz reactor, and the temperature was increased from room temperature to 150 °C over 1 h at a rate of 10 °C min<sup>-1</sup> under a flow of He (50 cm<sup>3</sup>min<sup>-1</sup>), and then the temperature was decreased to 50 °C. NH<sub>3</sub>/He (10/90, 50 cm<sup>3</sup>min<sup>-1</sup>) was pulsed into the reactor at 50 °C under a flow of He (10 cm<sup>3</sup>min<sup>-1</sup>) until the acid sites were saturated with NH<sub>3</sub>. The adsorbed NH<sub>3</sub> was removed by a flow of He (50 cm<sup>3</sup>min<sup>-1</sup>). When the baseline was stable, the temperature was increased from 50 °C to 350 °C at a rate of 10 °C min<sup>-1</sup>. The NH<sub>3</sub>-TPD curve of the Zr-HBA was shown in Fig. S2. Due to the decomposition temperature of the as-prepared catalyst was about 350 °C, the test could conduct under the temperature lower than 350 °C. It could be found that there existed large amounts of acid sites, which were mainly resulted from Zr<sup>4+</sup> (*RSC Adv.*, 2013, 3, 10277).

#### 4. Fig. S3

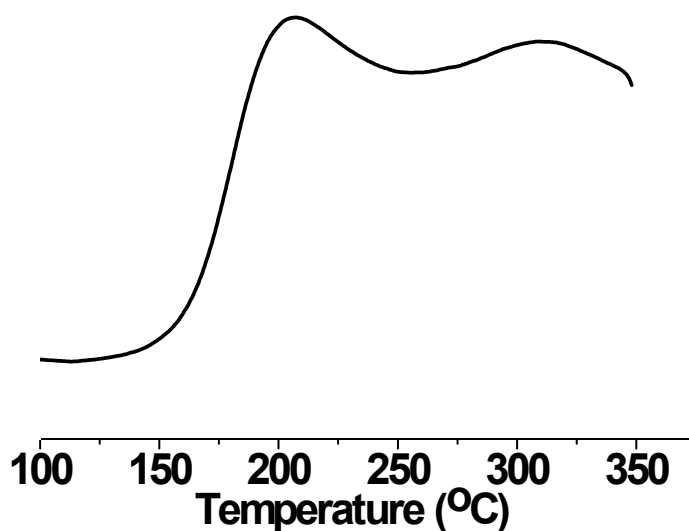

**Fig. S3.** CO<sub>2</sub>-TPD spectra of Zr-HBA. Temperature-programmed desorption of carbon dioxide (CO<sub>2</sub>-TPD) was performed on Micromeritics' AutoChem 2950 HP Chemisorption Analyzer. The catalysts were charged into the quartz reactor, and the temperature was increased from room temperature to 150 °C over 1 h at a rate of 10 °C min<sup>-1</sup> under a flow of He (50 cm<sup>3</sup>min<sup>-1</sup>), and then the temperature was decreased to 50 °C. CO<sub>2</sub> (50 cm<sup>3</sup>min<sup>-1</sup>) was pulsed into the reactor at 50 °C under a flow of He (10 cm<sup>3</sup>min<sup>-1</sup>) until the acid sites were saturated with CO<sub>2</sub>. The adsorbed CO<sub>2</sub> was removed by a flow of He (50 cm<sup>3</sup>min<sup>-1</sup>). When the baseline was stable, the temperature was increased from 50 °C to 350 °C at a rate of 10 °C min<sup>-1</sup>. The CO<sub>2</sub>-TPD curve of the Zr-HBA was shown in Fig. S3. Due to the decomposition temperature of the as-prepared catalyst was about 350 °C, the test could conduct under the temperature lower than 350 °C. It could be found that there existed large amounts of basic sites, which were mainly resulted from O<sup>2-</sup> in the carboxylate and phenate groups (*RSC Adv.*, 2013, 3, 10277).

5. Fig. S4

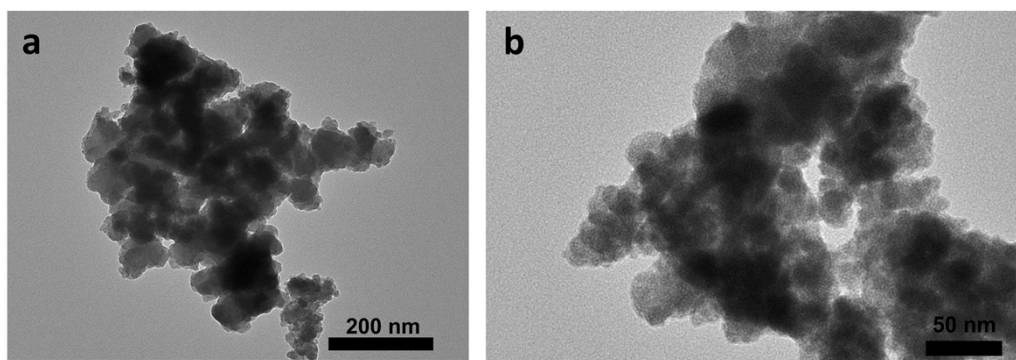

**Fig. S4.** TEM image of the as-prepared Zr-HBA.
